# Supplementary material for: Enhanced Taste Recognition Following Subacute Treatment With The Dopamine D2/D3 Receptor Agonist Pramipexole in Healthy Volunteers
Source: PubMed Central journal article supplement (PMC9515131; doi:10.1093/ijnp/pyac030), 2022-05-23
Supplement: pyac030_suppl_supplementary_material.pdf [file pyac030_suppl_supplementary_material.pdf]

Supplements to Kaltenboeck et al.: “Enhanced taste recognition following subacute treatment with the dopamine D2/D3 receptor agonist pramipexole in healthy volunteers”

**Supplementary Table 1: Overview of correct classifications per taste, intensity, and treatment group. Taste intensities range from I to IV with IV the highest taste intensity.**

| Taste            | Intensity | Correct Placebo | Correct Pramipexole |
|------------------|-----------|-----------------|---------------------|
| Sweet            | IV        | 100.0%          | 100.0%              |
| Sweet            | III       | 94.7%           | 95.0%               |
| Sweet            | II        | 68.4%           | 90.0%               |
| Sweet            | I         | 57.9%           | 75.0%               |
| Sour             | IV        | 94.7%           | 95.0%               |
| Sour             | III       | 63.2%           | 80.0%               |
| Sour             | II        | 15.8%           | 50.0%               |
| Sour             | I         | 0.0%            | 15.0%               |
| Salty            | IV        | 89.5%           | 90.0%               |
| Salty            | III       | 57.9%           | 70.0%               |
| Salty            | II        | 78.9%           | 70.0%               |
| Salty            | I         | 42.1%           | 55.0%               |
| Bitter           | IV        | 73.7%           | 90.0%               |
| Bitter           | III       | 73.7%           | 90.0%               |
| Bitter           | II        | 63.2%           | 75.0%               |
| Bitter           | I         | 31.6%           | 70.0%               |
| Neutral Sample 1 | -         | 89.5%           | 95.0%               |
| Neutral Sample 2 | -         | 78.9%           | 85.0%               |
| Neutral Sample 3 | -         | 100.0%          | 90.0%               |

**Supplementary Equation 1: Formulas for calculating target sensitivity and response bias where  $H$  denotes Hit rate and  $F$  denotes false alarm rate (Grier, 1971; Stanislaw & Todorov, 1999).**

$$Target\ sensitivity = \begin{cases} 0.5 + \frac{(H - F)(1 + H - F)}{4H(1 - F)} & \text{if } H \geq F \\ 0.5 - \frac{(F - H)(1 + F - H)}{4F(1 - H)} & \text{if } H < F \end{cases}$$

$$Response\ bias = \begin{cases} \frac{H(1 - H) - F(1 - F)}{H(1 - H) + F(1 - F)} & \text{if } H \geq F \\ \frac{F(1 - F) - H(1 - H)}{F(1 - F) + H(1 - H)} & \text{if } H < F \end{cases}$$
